# Supplementary material
Source: PubMed Central journal article supplement (PMC9559592)
Supplement: MP-44-1747-s001.pdf [file MP-44-1747-s001.pdf]

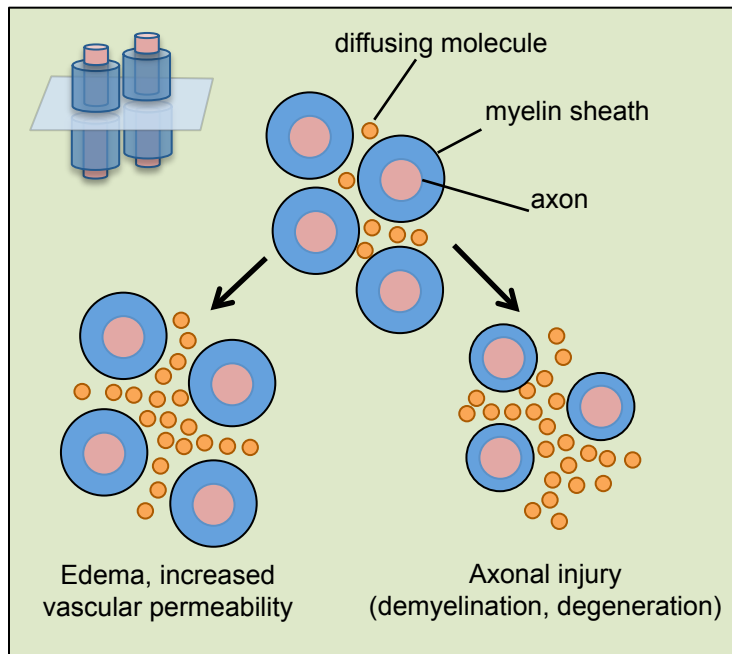

**Supplemental Figure 1.** Possible mechanisms for changes in diffusion parameters after radiation therapy including edema, increased vascular permeability, and axonal injury.
